1 **Blood glucose is a representative of the clustered indicators of**  
2 **multi-organ injury for predicting mortality of COVID-19 in Wuhan,**  
3 **China**

4 Jin-Kui Yang MD, PhD<sup>1</sup>✉#, Jian-Min Jin MD, PhD<sup>2,3</sup> ✉#, Shi Liu, MD<sup>3</sup>✉, Peng Bai,  
5 MD<sup>2,3</sup>, Wei He, MD<sup>4,3</sup>, Fei Wu, MD<sup>3</sup>, Xiao-Fang Liu, MD, PhD<sup>2</sup>, De-Min Han MD,  
6 PhD<sup>5</sup>

7 <sup>1</sup>Department of Endocrinology, Beijing Tongren Hospital, Capital Medical University, Beijing  
8 100730, China. ✉Electronic address: [jkyang@ccmu.edu.cn](mailto:jkyang@ccmu.edu.cn)

9 <sup>2</sup>Department of Respiratory and Critical Care Medicine, Beijing Tongren Hospital, Capital  
10 Medical University, Beijing 100730, China. ✉Electronic address: [jinjianmin1972@sina.com](mailto:jinjianmin1972@sina.com)

11 <sup>3</sup>Department of Internal Medicine, Union Hospital, Tongji Medical College, Huazhong University  
12 of Science and Technology, Wuhan 430022, China.

13 <sup>4</sup>Department of Critical Care Medicine, Beijing Tongren Hospital, Capital Medical University,  
14 Beijing 100730, China. ✉Electronic address: [1455019296@qq.com](mailto:1455019296@qq.com)

15 <sup>5</sup>Department of otolaryngology and head surgery, Beijing Tongren Hospital, Capital Medical  
16 University, Beijing 100730, China.

17 # These authors contributed equally to this paper.

18 ✉Address correspondence and reprint requests to

19 Professor Jin-Kui YANG, Department of Medicine, Beijing Tongren Hospital, Capital Medical  
20 University, Beijing 100730, China

21 Tel: +86-10-58268445

22 Fax: +86-10-65288736

23 Cell: +86-13911167636

24 [jkyang@ccmu.edu.cn](mailto:jkyang@ccmu.edu.cn)

25 or

26 Dr. Jian-Min Jin, Department of Critical Care Medicine, Beijing Tongren Hospital, Capital  
27 Medical University, Beijing 100730, China.

28 Jian-Min Jin: [jinjianmin1972@sina.com](mailto:jinjianmin1972@sina.com)

29 or

30 Professor Shi Liu, Department of Internal Medicine, Union Hospital, Tongji Medical College,  
31 Huazhong University of Science and Technology, Wuhan 430022, China.

32 E-mail: [1455019296@qq.com](mailto:1455019296@qq.com)

1 **Abstract**

2 **OBJECTIVE** Most patients with Coronavirus Disease 2019 (COVID-19) were *Mild*  
3 or *Moderate*. *Severe* patients progressed rapidly to *Critical* condition including  
4 multi-organ failure and even death. Identification of early predictive factors is  
5 urgently necessary to facilitate appropriate intensive care.

6 **METHODS** We included all patient admitted to Wuhan Union Hospital and treated  
7 by the supportive medical team of Beijing Tongren Hospital as of March 20, 2020.  
8 Indicators of injuries for multiple organs, including the heart, kidney and liver, and  
9 glucose homeostasis were specifically analyzed for predicting primary outcomes (an  
10 intensive care unit (ICU) or death).

11 **RESULTS** The data of 120 patients with a severity equal to or greater than *Moderate*,  
12 discharged or died were extracted. After excluding patients with history of diabetes,  
13 chronic heart, kidney, and liver disease, 69 patients were included in the final analysis.  
14 There were 26 cases with primary outcomes including 16 deaths. Univariable analysis  
15 indicated that fasting blood glucose (FBG), lactate dehydrogenase (LDH),  
16 hydroxybutyrate dehydrogenase (HBDH), creatine kinase and creatinine were  
17 associated with primary outcomes and death. Among patients with primary outcomes,  
18 although FBG levels were much higher on admission, they dramatically decreased  
19 subsequently, while in deceased patients they increased continuously. Multivariable  
20 Cox regression indicated that  $FBG \geq 7 \text{ mmol/L}$  was the only independent predictor for  
21 death (HR = 3.75, 95% CI 1.26-11.15). Cluster analysis found more proximities of  
22 FBG (at the time of admission) with LDH, HDDH or Creatinine (after 2-4 days of  
23 hospitalization) ( $r=0.43$ ,  $0.43$  and  $0.50$ , respectively,  $P<0.01$  for all).

24 **Conclusions** Blood glucose is a representative of the clustered indicators of  
25 multi-organ injury and earlier predictor for poor outcomes and death in the COVID  
26 patients. As it is easy to perform for clinical practices and self-monitoring, glucose  
27 testing will be much helpful for predicting poor outcomes to facilitate appropriate  
28 intensive care.

## 1 **Introduction**

2 In early December 2019, an outbreak of a novel coronavirus (SARS-CoV-2)  
3 pneumonia disease (COVID-19) occurred in Wuhan, China (1). Most patients with  
4 COVID-19 were *Mild. Moderate* patients often experienced dyspnea after one week.  
5 *Severe* patients progressed rapidly to critical condition including multi-organ failure  
6 and even death. Identification of early predictive factors for poor outcomes is urgently  
7 necessary to facilitate appropriate intensive care.

8 Although many case series studies have been published, the final clinical outcomes  
9 in most of these series remained unknown at the time of publication. Most importantly,  
10 clinical biochemical testing items were not uniform and without regular longitudinal  
11 testing. Some of the most accessible biochemical parameters, such as blood glucose  
12 were not assessed (2-5). Therefore, the estimation of risk factors for the severity and  
13 mortality of COVID-19 is not very robust.

14 We have previously reported that hyperglycemia was commonly present in SARS  
15 patients without prior history of diabetes and without using glucocorticoids, and was  
16 an independent predictor for mortality in SARS patients (6). Binding of SARS  
17 coronavirus to the ACE2 receptor may damage islets and causes acute diabetes (7), as  
18 seen with *ACE2* gene knockout leading to diabetes in mice (8).

19 SARS-CoV-2 infection is reminiscent of the SARS-CoV outbreak in early 2003,  
20 because both viruses attack cells via the same ACE2 receptor (9). In this observational  
21 cohort study, we aim to explore whether some organ damage including  
22 insulin-secreting pancreatic islet was already occurred at an early stage and hereby  
23 increased the risk of mortality later.

## 24 **Methods**

## 1 **Participants**

2 This retrospective cohort study included consecutive COVID-19 adult inpatients ( $\geq 18$   
3 years old) admitted to Wuhan Union Hospital (Wuhan, China) and treated by the  
4 supportive medical team of Beijing Tongren Hospital (Beijing, China) from January  
5 29, 2020, to March 20, 2020. Wuhan Union Hospital was assigned responsibility for  
6 the treatments of severe COVID-19 patients by the Wuhan government. Therefore,  
7 there are no mild COVID-19 patient and a uniformed protocol of clinical practices  
8 was used in this cohort.

9 Respiratory specimens were collected by the local center for disease control and  
10 prevention (CDC) and then shipped to designated authoritative laboratories to detect  
11 SARS-CoV-2. The presence of SARS-CoV-2 in respiratory specimens was detected  
12 by real-time RT-PCR methods. The RT-PCR assay was conducted as per the protocol  
13 established by the World Health Organization (WHO).

14 For the identification of indicators of early multi-organ injury for predicting poor  
15 outcomes, patients with a history of chronic organ damage, including heart  
16 disease(myocardial infarction and heart failure), kidney disease (maintenance dialysis  
17 or renal transplantation), liver disease (liver cirrhosis) or insulin-secreting pancreatic  
18 islet disease (diabetes) were excluded. Patients who received glucocorticoid treatment  
19 were also excluded to avoid glucocorticoid-induced diabetes. The clinical outcomes  
20 including an intensive care unit (ICU) or in-hospital death were monitored up to  
21 March 24, 2020, the final date of follow-up.

22 The Research Ethics Commission of Beijing Tongren Hospital, Capital Medical  
23 University (TRECKY2020-013) approved the study and the Ethics Commission  
24 waived the requirement for informed consent.

1 **Data collection**

2 Demographic, clinical, laboratory and outcome data were extracted from the  
3 electronic hospital information system using a standardized form. All medical data  
4 were checked by two medical doctors (JMJ and PB) and the leader author (JKY)  
5 adjudicated any different interpretation between the two medical doctors.

6 **Definitions**

7 Diagnosis and clinical classification criteria and treatment plan (version 6.0) of  
8 COVID-19 was launched by the National Health Committee of China  
9 (<http://www.nhc.gov.cn/>). The clinical classification of severity is as follows: (1) *Mild*,  
10 having only mild symptoms, imaging shows no pneumonia. (2) *Moderate*, with fever,  
11 respiratory tract symptoms, and imaging shows pneumonia. (3) *Severe*, meet any of  
12 the following signs: a) respiratory distress, respiratory rate  $\geq 30$  beats / min; b) in the  
13 resting state, finger oxygen saturation  $\leq 93\%$  arterial blood oxygen partial pressure  
14 ( $\text{PaO}_2/\text{oxygen concentration (FiO}_2) \leq 300\text{mmHg}$  (1mmHg = 0.133kPa). (4) *Critical*,  
15 one of the following conditions: a) respiratory failure occurs and requires mechanical  
16 ventilation; b) Shock occurs; c) ICU admission is required for combined organ failure.

17 **Immunohistochemical patterns of ACE2**

18 Lung, pancreas, heart, kidney and liver tissue was obtained from a 43-year-old  
19 brain-dead organ donor after informed consent from his wife. The protocol was  
20 approved by the ethics committee of Beijing Tongren Hospital, Capital Medical  
21 University. Serial sections were made from each of the tissues, and ACE2  
22 immunohistochemical staining was compared with negative controls. A qualified  
23 pathologist interrelated the results of ACE2 expression.

24 **Statistical analysis**

1 Data were expressed as median (interquartile range (IQR)) or percentage, as  
2 appropriate. Comparison of continuous data among different severity groups and  
3 between the deceased and survivor groups were determined using a Kruskal-Wallis  
4 test and Mann-Whitney U test, respectively. Chi-square ( $\chi^2$ ) test for trend and  
5 two-group Chi-square tests or Fisher's exact tests were used for categorical variables  
6 as appropriate. Proximity Matrix and Dendrogram of six measures as different organ  
7 damage indicators were calculated and developed by Hierarchical cluster analysis. To  
8 explore the risk factors associated with poor outcomes, univariate and multivariate  
9 logistic regression models were used. To find the risk factors predicting in-hospital  
10 death, univariate and multivariate Cox proportional hazard model were used to  
11 calculated hazard ratio (HR). Considering the relatively small number of poor  
12 outcomes and deaths in this study and to avoid overfitting in the model, age, gender,  
13 and five variables indicating different organs damage were chosen for multivariable  
14 analysis. Kaplan–Meier survival curves and the log-rank test were used for testing the  
15 survival between normal and abnormal indicators. SPSS for Windows 17.0 and  
16 Graphpad prism 7.0 software were used for statistical analysis, with statistical  
17 significance set at 2-sided  $P < 0.05$ .

## 18 **Results**

### 19 *Demographic and clinical characteristics*

20 A total of 120 consecutive COVID-19 adult inpatients ( $\geq 18$  years old) were admitted  
21 to Wuhan Union Hospital (Wuhan, China) and treated by the supportive medical team  
22 of Beijing Tongren Hospital (Beijing, China) from January 29, 2020 to March 20,  
23 2020. Because Wuhan Union Hospital was assigned responsibility for the treatments  
24 of severe COVID-19 patients by the Wuhan government, most patients were *Severe* or

1 *Critical*, some were *Moderate*, but none were *Mild* according to the guidance  
2 provided by the Chinese National Health Commission. Exclusion criteria included:  
3 still hospitalized patients as of March 24, 2020, patients with chronic organ damage  
4 (history of myocardial infarction, heart failure, dialysis, renal transplant, cirrhosis,  
5 diabetes), and patients missing basic medical information. Ultimately, 69 patients  
6 were included in the final analysis.

7 Of the 69 patients, 23 were *Moderate*, 20 were *Severe*, and 26 were *Critical* based  
8 on severity classification. There were 53 survivors and 16 deceased patients in this  
9 study (Table 1). Of the deceased patients, the median (interquartile ranges, IQR)  
10 period from symptom onset to death and the median (IQR) period from  
11 hospitalization to death were 14 (10-22) days and 3 (3-7) days, respectively.

12 In this hospital-based cohort, the median age of the 69 patients was 61 years (IQR,  
13 52 to 67). Older patients tend to be more serious ( $\chi^2$  test for trend,  $p=0.024$ ), but no  
14 significant difference of age was present between survivors and deceased patients  
15 within hospitalized patients.

16 The ratio of male to female patients were relatively similar, with 49.3% males.  
17 However, the proportion of males in survivors and deceased patients were 39.6% and  
18 81.2%, respectively, suggestive that males may have higher mortality from  
19 COVID-19 (relative risk (95% CI): 2.0 (1.28-3.02),  $\chi^2$  test,  $P=0.004$ ).

20 Fever (89.9), cough (65.2%) and dyspnea (43.5%) were the most common  
21 symptoms, while sputum (17.4%) and diarrhea (17.4%) were less common.

22 An increase in white blood cells and neutrophils, and decrease in lymphocytes and  
23 platelets occurred in both *Critical* and deceased patients at the time of admission.  
24 And these changes became more obvious at the time after 2-4 days of hospitalization.

1 A slight transient decrease in blood potassium and sodium ion levels was seen in  
2 *Critical* patients. A persistent decrease of albumin and increase of globulin were  
3 present in *Critical* and deceased patients ([Table 1](#)).

4 C-reactive protein was increased at the time of admission but dramatically and  
5 significantly decreased to the normal range at the time after 2-4 days of  
6 hospitalization in survivors. A persistent increase of C-reactive protein was present in  
7 deceased patients ([Table 1](#)).

#### 8 ***Indicators of multi-organ injury***

9 To investigate multi-organ injury caused by the virus, the ACE2 protein expression  
10 profile was analyzed in tissues, including the lung, heart, liver, kidney, and pancreas  
11 which was obtained from the organ donor. In the lung, ACE2 immunostaining was  
12 abundant in epithelial cells of bronchioles and pulmonary alveoli. In the heart, it was  
13 highly expressed in the myocardium. According to our previous study in the mouse  
14 pancreas, ACE2 was strongly expressed in pancreatic endocrine islet(8). Indeed,  
15 compared to the negative controls, ACE2 was intensely stained in the pancreatic  
16 endocrine islets, but very weakly stained in pancreatic exocrine tissues. In the kidney,  
17 ACE2 was strong in glomerular parietal epithelial cells and weak in the visceral  
18 epithelial cells. Interestingly, ACE2 expression was negative in the liver. Moreover,  
19 ACE2 was also negative in the endothelial lining of the hepatic sinusoids ([Figure 1A](#)).

20 Fasting blood glucose ([FBG](#)), lactate dehydrogenase ([LDH](#)), alanine  
21 aminotransferase ([ALT](#)) and creatinine ([Cr](#)) were used as indicators for the relative  
22 function of multiple organs (i.e., insulin-secreting pancreatic islet, heart, liver, and  
23 kidney injury, respectively). In parallel with the expression profiles of ACE2 in  
24 different organs, indicators of the relative function of multiple organs except the liver



1 can predict death. Kaplan-Meier analysis revealed a significantly higher in-hospital  
2 death rate for patients with elevated indicators for relative multi-organ injury, i.e.,  
3 FBG  $\geq 7.0$ mmol/L for the pancreatic islet, LDH  $\geq 250$  IU/L for the heart, Cr  $\geq 97$   
4  $\mu$ mol/L for the kidney and ALT  $\geq 40$  IU/L for the liver (Figure 1B).

5 Indicators including creatine kinase (CK), MB isoenzyme of creatine kinase  
6 (CK-MB), aspartate aminotransferase (AST), hydroxybutyrate dehydrogenase  
7 (HBDH), alkline phosphatase (AKP), and blood urea nitrogen (BUN) were also tested  
8 at the time of admission and during subsequent treatment. Indicators of cardiac injury,  
9 including LDH, HBDH, CK, and CK-MB, were remarkably increased in *Critical* and  
10 deceased patients. Kidney injury, indicated by BUN and Cr elevations, was observed  
11 in deceased patients. Liver injury, indicated by ALT and AST levels, was not observed  
12 at the time of admission and at the time after 2-4 days of hospitalization. (Table 1).

### 13 ***Longitudinal changes of the indicators***

14 FBG and LDH levels were much higher above the upper limit of normal value at the  
15 time of admission and at the time after 2-4 days of hospitalization in the *Critical*  
16 group, while FBG and LDH levels did not increase remarkably in *Severe* and  
17 *Moderate* groups. However, Cr and ALT levels were not remarkably different among  
18 *Moderate*, *Severe* and *Critical* groups (Figure 1C). To further find the predictive  
19 values of these four indicators, a longitudinal case-control investigation was  
20 conducted in *Critical* patients, considering that the in-hospital deaths happened only  
21 in *Critical* patients in this cohort. The patients with test values for at least three time  
22 points were selected in *Critical* patients. Because the median (IQR) period from  
23 hospitalization to death was 3 (3-7) days and the clinical parameters were tested every  
24 2-4 days, only 5 *Critical* patients who survived and 5 *Critical* patients who died were

1 compared. It is meaningful to find out that although FBG and LDH levels were much  
2 higher above the upper limit of normal value at the time of admission, they  
3 dramatically decreased to the normal range during subsequent treatment in *Critical*  
4 patients who survived. However, of the patients who died, increases of FBG and LDH  
5 levels continued (Figure 1D-E). These changing trends of Cr and ALT levels in  
6 survived and deceased patients were not found (Figure 1F-G).

### 7 ***The independent indicators for poor outcomes***

8 In univariable Logistic regression analysis, odds of critical condition were higher in  
9 patients with old age, elevated FBG, LDH, and HBDH (Figure 2A). In the  
10 multivariable analysis, FBG (OR:6.54, 95%CI: 1.18-36.08) and HBDH (OR:6.54,  
11 95%CI: 1.18-36.08) were independent risk factor of critical condition (Figure 2B).

12 Using the univariable Cox proportional hazards model, male sex (HR = 5.02, 95%  
13 CI 1.43-17.62), elevated FBG (HR = 5.09, 95% CI 1.76-14.70), LDH (HR = 9.73, 95%  
14 CI 1.28-73.7) and HBDH (HR = 3.81, 95% CI 1.23-11.85) were predictors for death  
15 (Figure 2C). In the multivariable model, elevated FBG remained the only independent  
16 predictor for death (HR = 3.75, 95% CI 1.26-11.15) (Figure 2D).

17 To interpret the difference of univariable and multivariable regression results which  
18 suggested that these indicators were interdependent to each other, Hierarchical cluster  
19 analysis of six indicators was performed. At the time of admission (a), significant  
20 proximities of LDH (a) with HBDH (a) ( $r=0.73$ ,  $P<0.01$ ) and CK (a) with HBDH (a)  
21 ( $r=0.49$ ,  $P<0.01$ ) were present. No significant proximities of FBG (a) with other  
22 Variables (a), ALT(a) with other Variables (a) and Cr (a) with other Variables were  
23 observed. These results suggested that some definite indicators for multi-organ failure  
24 were independent. However, at the time after 2-4 days of hospitalization (b), more

1 significant proximities among Variables (b), especially FBG (b) with other Variables  
2 (b) were found. These suggested that multi-organ injury might present at the same  
3 time caused by the virus infection. Most interestingly, significant proximities of FBG  
4 (a) (at the time of admission) with other Variables (b) (at the time after 2-4 days of  
5 hospitalization) including LDH (b) ( $r=0.43$ ,  $P<0.01$ ), HDDH (b) ( $r=0.43$ ,  $P<0.01$ ), Cr  
6 (b) ( $r=0.50$ ,  $P<0.01$ ) were present. Therefore, abnormal glucose homeostasis indicated  
7 the relative dysfunction of pancreatic islet occurred earlier than that of other organs  
8 (Table 2). The dendrogram of Variables (b) (at the time after 2-4 days of  
9 hospitalization) suggested more proximity of FBG with LDH/HBDH equations than  
10 the other equations. Heart injury indicated by LDH/HBDH and relative islet  
11 dysfunction indicated by FBG was in a cluster solution if setting distance at 15  
12 according to the Hierarchical cluster analysis (Figure 2E). This suggests that FBG and  
13 LDH/HBDH are interdependent to each other. Furthermore, results of the cluster  
14 analysis can interpret why the multivariable regression results indicated that FBG is  
15 the only independent predictor for in-hospital death.

## 16 **Conclusions**

17 In this study, for the first time, we identified early indicators of multi-organ injury for  
18 predicting severity and mortality in patients with COVID-19. Elevation of FBG, LDH,  
19 HBDH, CK and Cr were associated with higher odds of critical condition and a higher  
20 hazards ratio of in-hospital death. In particular, Hierarchical cluster analysis suggested  
21 that some definite indicators for multi-organ failure were interdependent to each other,  
22 indicating that multi-organ injury was present at the same time caused by the virus  
23 infection. Multivariable regression results indicated that FBG is the only independent  
24 predictor for in-hospital death.

1 The multi-organ nature of COVID-19 or SARS-CoV-2 infection has been  
2 demonstrated in a latest autopsy studies (10). Moreover, an autopsy study on 3 cases  
3 of SARS indicate that some lesions observed in heart, kidney, pancreas may have  
4 existed before the hospitalization (11). We found that the SARS-CoV-2 receptor,  
5 ACE2 is highly expressed in multiple organs including the lung, the heart, the kidney  
6 and the pancreatic islet.

7 Acute heart injury (AHI) such as acute myocarditis is common in patients with  
8 viral infection, such as adenovirus, herpesvirus and enterovirus (12). Since carditis  
9 associated with coronavirus infection was first reported in 1980 (13), growing  
10 evidence shows that coronavirus is also a pathogen for AHI that should not be ignored.  
11 Early in 2003, we reported that SARS-CoV may cause AHI and elevated LDH is an  
12 independent predictor for in-hospital death in SARS patients (7). A report from Saudi  
13 Arabia indicated that Middle East Respiratory Syndrome coronavirus (MERS-CoV)  
14 could cause acute myocarditis and acute-onset heart failure (14). The latest case report  
15 described cardiac involvement in a patient with COVID-19 (15). Two myocardial  
16 enzymes, LDH and HBDH exist in myocardia and release into blood flow once the  
17 myocardial injury happens. In this study, we found that both high LDH and HBDH on  
18 admission were predictor for severity and in-hospital death.

19 Acute kidney injury (AKI), same as AHI, is also common in patients with virus  
20 infection, such as Parvovirus B19, Hanta, Ebola, and Dengue virus infection (16).  
21 Coronavirus associated AKI was reported in patients with MDRS (17). In the previous  
22 report, we found that SARS-CoV may cause AKI and elevated Cr is an independent  
23 predictor for in-hospital death in SARS patients (7). In this study, we found that  
24 elevation of both BUN and Cr were present in *Critical* and deceased patients. High Cr

1 on admission were predictor for severity and in-hospital death in COVID-19 patients.

2 Acute liver injury (ALI) was reported in SARS patients, which was manifested  
3 with mild elevation of ALT/AST levels. Decreased serum albumin levels was present  
4 in some patients. However, ALT and AST was not an independent predictor of poor  
5 outcome (18). A number of studies have shown that elevated liver enzymes and  
6 decreased albumin levels were present in patients with MERS (19). Case reports  
7 suggested that patients with severe COVID-19 seem to have higher rates of liver  
8 dysfunction (20). However, few studies have shown the liver enzymes were  
9 independent predictor for poor outcome and mortality in COVID-19 patients. In this  
10 study, although mild decrease of albumin was found in *Critical* and deceased patients,  
11 significant differences of liver enzymes were not found between survivors and  
12 deceased patients in this cohort. We propose that liver injury may not be a direct  
13 damage caused by the virus, because we found that expression of the SARS-CoV-2  
14 receptor, ACE2 in the liver is very low.

15 Acute pancreatic islet injury (AII) caused by virus infection has scarcely been  
16 reported. Subacute islet injury caused by virus infection has been widely reported in  
17 type 1 diabetes, which is an autoimmune disease characterized by a long-term loss of  
18 pancreatic islet  $\beta$ -cells. However, serological evidence of infection and isolation of  
19 viruses from the pancreas have been reported in a few cases of recently diagnosed  
20 acute diabetes (21). A case-control study indicated that high FBG is an independent  
21 predictor for severity of H1N1 pneumonia. In this study, FBG was remarkably  
22 increased in patients with H1N1 pneumonia than in patients with non-H1N1  
23 pneumonia (8.3 vs. 6.2 mmol/L). Moreover, compensative rise in insulin, in  
24 corresponding with high FBG was not found; instated, islet  $\beta$ -cells function indicated

1 by HOMA- $\beta$  index is relatively lower (103 vs. 134) (22).

2 It is reasonable to think that FBG elevation maybe caused by “Stress  
3 hyperglycemia” during acute illness in patients with COVID-19. However, severe  
4 hyperglycemia is related to both insulin secretion and insulin resistance. Insulin  
5 resistance caused by metabolic, hormonal, and cytokine changes associated with the  
6 illness demands a corresponding rise in insulin output in order to maintain normal  
7 glycemia. Only when the compensation is lost will blood glucose increase  
8 significantly (23, 24). Therefore, relative dysfunction of pancreatic islet insulin  
9 secretion caused by the virus infection maybe the main reason of severe  
10 hyperglycemia in patients with COVID.

11 Additionally, consistent with many previous reports, male gender, changes of blood  
12 cell counting, persistent increase of C-reactive protein on admission and during  
13 subsequent treatment were associated with higher poor outcomes in this study.

14 There are several limitations in our study. First, due to the critical condition of the  
15 disease, laboratory examinations were performed according to the clinical care needs  
16 of the patient, longitudinal testing interval was not firm and were performed every 2-4  
17 days. Laboratory data at some points is missing. Second, we only assessed  
18 multi-organ injury from the perspective of some most accessible biochemical  
19 parameters. It would have produced better results if some more specific  
20 indicators such as echocardiography, glomerular filtration rate and serum insulin  
21 levels were also measured in this study, and if we could assess some organ  
22 injury-specific mortality. Last but not least, interpretation might be limited by the  
23 sample size of the study. However, by including all patients of department of critical  
24 care medicine in the designated hospitals, we believe our study population of

1 COVID-19 is a representative of patients treated in Wuhan.

2 In summary, except pneumonia, multi-organ injury including the heart, kidney, and  
3 possibly pancreatic islet injuries was already occurred at an early stage and thereby  
4 increased the risk of mortality later in patients with COVID-19. These multi-organ  
5 injury indicators including LDH, HBDH, CK, Cr and FBG were associated with  
6 higher odds of primary outcomes and death. However, these indicators are clustered  
7 interdependent to each other, indicating that the multi-organ damage happened at the  
8 same time as the infection. Among them, FBG is a representative of the clustered  
9 indicators of multi-organ injury for predicting mortality of COVID-19. As it is easy to  
10 perform for clinical practices and self-monitoring, FBG testing will be much helpful  
11 for predicting critical condition to facilitate appropriate intensive care.

12

### 13 **Article Information**

14 **Funding.** This study was funded by the National Key R&D Program of China  
15 (2017YFC0909600).

16 **Duality of Interest.** No potential conflicts of interest relevant to this article were  
17 reported.

18 **Author Contributions.** J.K.Y. designed and performed the analysis and wrote the manuscript.  
19 J.M.J., P.B., F.G., W.H., F.W., and S.L. collected the epidemiological and clinical data and  
20 processed statistical data. J.K.Y., J.M.J. and D.M.H. revised the final manuscript. J.K.Y., J.M.J.  
21 and S.L. are the guarantors of this work and, as such, had full access to all the data in the study  
22 and take responsibility for the integrity of the data and the accuracy of the data analysis.

23

### 24 **References**

25 1. Zhu N, Zhang D, Wang W, Li X, Yang B, Song J, et al. A Novel Coronavirus from Patients  
26 with Pneumonia in China, 2019. *N Engl J Med.* 2020.

- 1 2. Huang C, Wang Y, Li X, Ren L, Zhao J, Hu Y, et al. Clinical features of patients infected with  
2 2019 novel coronavirus in Wuhan, China. *Lancet*. 2020;395(10223):497-506.
- 3 3. Chen N, Zhou M, Dong X, Qu J, Gong F, Han Y, et al. Epidemiological and clinical  
4 characteristics of 99 cases of 2019 novel coronavirus pneumonia in Wuhan, China: a  
5 descriptive study. *Lancet*. 2020;395(10223):507-13.
- 6 4. Wang D, Hu B, Hu C, Zhu F, Liu X, Zhang J, et al. Clinical Characteristics of 138  
7 Hospitalized Patients With 2019 Novel Coronavirus-Infected Pneumonia in Wuhan, China.  
8 *JAMA*. 2020.
- 9 5. Xu XW, Wu XX, Jiang XG, Xu KJ, Ying LJ, Ma CL, et al. Clinical findings in a group of  
10 patients infected with the 2019 novel coronavirus (SARS-Cov-2) outside of Wuhan, China:  
11 retrospective case series. *BMJ*. 2020;368:m606.
- 12 6. Yang JK, Feng Y, Yuan MY, Yuan SY, Fu HJ, Wu BY, et al. Plasma glucose levels and diabetes  
13 are independent predictors for mortality and morbidity in patients with SARS. *Diabet Med*.  
14 2006;23(6):623-8.
- 15 7. Yang JK, Lin SS, Ji XJ, and Guo LM. Binding of SARS coronavirus to its receptor damages  
16 islets and causes acute diabetes. *Acta Diabetol*. 2010;47(3):193-9.
- 17 8. Niu MJ, Yang JK, Lin SS, Ji XJ, and Guo LM. Loss of angiotensin-converting enzyme 2 leads  
18 to impaired glucose homeostasis in mice. *Endocrine*. 2008;34(1-3):56-61.
- 19 9. National Health Commission of PRC: Feb 23: Daily briefing on novel coronavirus cases in  
20 China. [http://emhcgovcn/2020-02/23/c\\_76779htm](http://emhcgovcn/2020-02/23/c_76779htm).
- 21 10. Yao XH, Li TY, He ZC, Ping YF, Liu HW, Yu SC, et al. [A pathological report of three  
22 COVID-19 cases by minimally invasive autopsies]. *Zhonghua Bing Li Xue Za Zhi*.  
23 2020;49(0):E009.
- 24 11. Lang Z, Zhang L, Zhang S, Meng X, Li J, Song C, et al. Pathological study on severe acute  
25 respiratory syndrome. *Chin Med J (Engl)*. 2003;116(7):976-80.
- 26 12. Pollack A, Kontorovich AR, Fuster V, and Dec GW. Viral myocarditis--diagnosis, treatment  
27 options, and current controversies. *Nat Rev Cardiol*. 2015;12(11):670-80.
- 28 13. Riski H, Hovi T, and Frick MH. Carditis associated with coronavirus infection. *Lancet*.  
29 1980;2(8185):100-1.
- 30 14. Alhogbani T. Acute myocarditis associated with novel Middle east respiratory syndrome  
31 coronavirus. *Ann Saudi Med*. 2016;36(1):78-80.
- 32 15. Inciardi RM, Lupi L, Zaccone G, Italia L, Raffo M, Tomasoni D, et al. Cardiac Involvement in  
33 a Patient With Coronavirus Disease 2019 (COVID-19). *JAMA Cardiol*. 2020.
- 34 16. Prasad N, Novak JE, and Patel MR. Kidney Diseases Associated With Parvovirus B19, Hanta,  
35 Ebola, and Dengue Virus Infection: A Brief Review. *Adv Chronic Kidney Dis*.  
36 2019;26(3):207-19.
- 37 17. Mackay IM, and Arden KE. MERS coronavirus: diagnostics, epidemiology and transmission.  
38 *Virology*. 2015;12:222.
- 39 18. Wu KL, Lu SN, Changchien CS, Chiu KW, Kuo CH, Chuah SK, et al. Sequential changes of  
40 serum aminotransferase levels in patients with severe acute respiratory syndrome. *Am J Trop  
41 Med Hyg*. 2004;71(2):125-8.
- 42 19. Xu L, Liu J, Lu M, Yang D, and Zheng X. Liver injury during highly pathogenic human  
43 coronavirus infections. *Liver Int*. 2020.



- 1 20. Cui Y, Tian M, Huang D, Wang X, Huang Y, Fan L, et al. A 55-Day-Old Female Infant  
2 infected with COVID 19: presenting with pneumonia, liver injury, and heart damage. *J Infect*  
3 *Dis.* 2020.
- 4 21. Jaeckel E, Manns M, and Von Herrath M. Viruses and diabetes. *Ann N Y Acad Sci.*  
5 2002;958:7-25.
- 6 22. Wang W, Chen H, Li Q, Qiu B, Wang J, Sun X, et al. Fasting plasma glucose is an  
7 independent predictor for severity of H1N1 pneumonia. *BMC Infect Dis.* 2011;11:104.
- 8 23. Gupta D, Krueger CB, and Lastra G. Over-nutrition, obesity and insulin resistance in the  
9 development of beta-cell dysfunction. *Curr Diabetes Rev.* 2012;8(2):76-83.
- 10 24. Dungan KM, Braithwaite SS, and Preiser JC. Stress hyperglycaemia. *Lancet.*  
11 2009;373(9677):1798-807.  
12

**Table 1: Demography, clinical and laboratory parameters of patients with COVID-19**

|                                            | All patients<br>(n=69) | Severity           |                  |                    | P<br>value     | Mortality          |                    | P<br>value     |
|--------------------------------------------|------------------------|--------------------|------------------|--------------------|----------------|--------------------|--------------------|----------------|
|                                            |                        | Moderate<br>(n=23) | Severe<br>(n=20) | Critical<br>(n=26) |                | Survivor<br>(n=53) | Deceased<br>(n=16) |                |
| Age—yrs                                    | 61 (52-67)             | 56 (47-64)         | 62 (55-67)       | 65 (57-71)         | <b>0.024</b> ‡ | 60 (51-67)         | 64 (57-68)         | 0.232†         |
| Male sex—n (%)                             | 34 (49.3)              | 9 (39.1)           | 8 (40.0)         | 16 (61.5)          | 0.111#         | 21(39.6)           | 13 (81.2)          | <b>0.003</b> ! |
| Symptoms                                   |                        |                    |                  |                    |                |                    |                    |                |
| Fever—n (%)                                | 62 (89.9)              | 18 (78.3)          | 19 (95.0)        | 25 (96.2)          | <b>0.041</b> # | 47 (88.7)          | 15 (93.8)          | 0.340!         |
| Cough—n (%)                                | 45 (65.2)              | 13 (56.5)          | 13 (65.0)        | 19 (73.1)          | 0.225#         | 32 (60.4)          | 13 (81.3)          | 0.077!         |
| Sputum—n (%)                               | 12 (17.4)              | 5 (21.7)           | 4 (20.0)         | 3 (11.5)           | 0.341#         | 10 (18.9)          | 2 (12.5)           | 0.265!         |
| Dyspnea—n (%)                              | 30 (43.5)              | 7 (30.4)           | 7 (35.0)         | 16 (61.5)          | <b>0.026</b> # | 22 (41.5)          | 8 (50.0)           | 0.188!         |
| Fatigue—n (%)                              | 26 (37.7)              | 8 (34.8)           | 6 (30.0)         | 12 (46.2)          | 0.397#         | 18 (34.0)          | 8 (50.0)           | 0.118!         |
| Diarrhea—n (%)                             | 12 (17.4)              | 2 (8.7)            | 5 (25.0)         | 5 (19.2)           | 0.350#         | 9 (17.0)           | 3 (18.8)           | 0.282!         |
| From onset to hospitalization—days         | 12.0 (9.0-14.0)        | 13.0 (10.0,15.0)   | 11.5 (7.8,14.0)  | 12.0 (7.0,14.0)    | 0.273‡         | 13.0 (10.0,14.0)   | 11.5 (7.3,14.0)    | 0.348†         |
| Haemoglobin—g/L                            | (a) 127 (116-139)      | 124 (117-137)      | 119 (110-143)    | 130 (121-147)      | .477‡          | 125 (115-136)      | 131 (122-151)      | .233†          |
|                                            | (b) 126 (116-140)      | 130 (113-141)      | 123 (115-134)    | 128 (118-143)      | .704‡          | 124 (116-137)      | 137 (118-149)      | .200†          |
| Platelet count—×10 <sup>9</sup> /L         | (a) 211(183-282)       | 215 (192-286)      | 215 (196-293)    | 205 (159-263)      | .515‡          | 219 (193-290)      | 197 (146-234)      | .067†          |
|                                            | (b) 232 (171-359)      | 258 (184-367)      | 316 (186-443)    | 189 (135-257)      | .061‡          | 258 (185-385)      | 151 (132-190)      | <b>.002</b> †  |
| White blood cell count—×10 <sup>9</sup> /L | (a) 6.2 (4.7-8.2)      | 5.7 (4.3-7.4)      | 5.9 (4.8-8.1)    | 7.7 (5.9-9.7)      | <b>.009</b> ‡  | 5.9 (4.6-7.6)      | 8.1 (6.3-9.5)      | <b>.002</b> †  |
|                                            | (b) 6.9 (4.8-9.0)      | 5.9 (4.7-8.7)      | 6.2 (4.1-8.5)    | 8.0 (5.9-10.4)     | .076‡          | 6.0 (4.7-8.7)      | 8.7 (7.1-12.4)     | <b>.007</b> †  |
| Neutrophil count—×10 <sup>9</sup> /L       | (a) 4.5 (3.1-6.7)      | 3.3 (2.7-4.9)      | 4.2 (3.7-5.9)    | 6.7 (5.4-8.8)      | <b>.000</b> ‡  | 4.0 (3.0-5.9)      | 7.0 (5.6-8.4)      | <b>.000</b> †  |
|                                            | (b) 4.9 (3.4-7.6)      | 3.6 (2.9-5.8)      | 4.1 (2.7-6.0)    | 6.7 (4.9-8.5)      | <b>.005</b> ‡  | 4.2 (3.2-6.2)      | 7.8 (6.1-11.5)     | <b>.000</b> †  |
| Lymphocyte count—×10 <sup>9</sup> /L       | (a) 1.0 (0.7-1.4)      | 1.3 (0.9-1.7)      | 0.9 (0.7-1.4)    | 0.7 (0.4-1.1)      | <b>.000</b> ‡  | 1.0 (0.7-1.5)      | 0.6 (0.4-1.1)      | <b>.002</b> †  |
|                                            | (b) 1.1 (0.7-1.4)      | 1.3 (1.1-1.9)      | 1.1 (1.0-1.6)    | 0.7 (0.5-1.0)      | <b>.003</b> ‡  | 1.2 (1.0-1.6)      | 0.6 (0.3-0.7)      | <b>.000</b> †  |
| Potassium—mmol/L                           | (a) 3.9 (3.5-4.3)      | 4.1 (3.9-4.4)      | 3.8 (3.5-4.5)    | 3.7 (3.2-4.0)      | <b>.025</b> ‡  | 3.9 (3.5-4.3)      | 3.9 (3.6-4.3)      | .789†          |
|                                            | (b) 4.2 (3.8-4.5)      | 4.4 (4.2-4.8)      | 4.1 (3.8-4.5)    | 3.8 (3.7-4.3)      | .084‡          | 4.2 (3.8-4.5)      | 4.0 (3.7-4.6)      | .659†          |
| Sodium—mmol/L                              | (a) 139 (137-142)      | 140 (138-142)      | 141 (138-143)    | 138 (135-141)      | .078‡          | 140 (138-142)      | 137 (135-141)      | <b>.008</b> †  |
|                                            | (b) 139 (137-143)      | 140 (137-142)      | 141 (138-143)    | 138 (136-142)      | .517‡          | 139 (138-142)      | 138 (135-143)      | .335†          |
| Chloride—mmol/L                            | (a) 104 (99-106)       | 105 (102-106)      | 104 (100-108)    | 103 (98-105)       | .109‡          | 104 (100-106)      | 103 (98-106)       | .136†          |

|                                      |     |               |               |               |               |       |               |                |       |
|--------------------------------------|-----|---------------|---------------|---------------|---------------|-------|---------------|----------------|-------|
|                                      | (b) | 103 (101-106) | 102 (102-104) | 104 (101-109) | 103 (101-104) | .757‡ | 103 (101-107) | 103 (101-104)  | .701‡ |
| Albumin—g/L                          | (a) | 29 (27-34)    | 34 (30-39)    | 28 (26-31)    | 28 (25-30)    | .001‡ | 30 (27-35)    | 28 (25-29)     | .091‡ |
|                                      | (b) | 29 (26-33)    | 33 (29-40)    | 30 (28-33)    | 26 (23-29)    | .000‡ | 30 (27-33)    | 26 (22-28)     | .001‡ |
| Globulin—g/L                         | (a) | 32 (29-36)    | 30 (26-34)    | 32 (30-38)    | 34 (30-39)    | .027‡ | 31 (29-35)    | 36 (31-39)     | .038‡ |
|                                      | (b) | 33 (30-37)    | 30 (27-34)    | 32 (28-37)    | 35 (32-39)    | .008‡ | 32 (29-36)    | 35 (32-38)     | .079‡ |
| C-reactive protein—mg/L              | (a) | 36 (5-77)     | 4 (1-36)      | 23 (7-65)     | 60 (47-100)   | .000‡ | 31 (3-60)     | 80 (41-119)    | .001‡ |
|                                      | (b) | 8 (3-51)**    | 4 (2-7)       | 6 (3-10)      | 67 (28-104)   | .000‡ | 6 (2-14)**    | 78 (51-105)    | .000‡ |
| Alanine<br>aminotransferase—U/L      | (a) | 38 (24-52)    | 39 (21-49)    | 37 (24-55)    | 36 (27-52)    | .641‡ | 37 (24-52)    | 38 (24-51)     | .806‡ |
|                                      | (b) | 30 (22-62)    | 32 (21-68)    | 31 (21-72)    | 38 (26-56)    | .641‡ | 35 (22-69)    | 38 (26-56)     | .912‡ |
| Aspartate<br>aminotransferase—U/L    | (a) | 33 (23-47)    | 23 (17-34)    | 35 (28-50)    | 35 (29-56)    | .007‡ | 32 (20-47)    | 36 (29-83)     | .067‡ |
|                                      | (b) | 27 (21-46)    | 22 (18-30)    | 34 (22-45)    | 28 (22-54)    | .108‡ | 25 (21-41)    | 34 (23-57)     | .166‡ |
| Alkaline<br>phosphatase—U/L          | (a) | 57 (48-67)    | 55 (46-70)    | 55 (41-62)    | 61 (53-79)    | .067‡ | 57 (47-66)    | 60 (50-88)     | .224‡ |
|                                      | (b) | 65 (54-80)    | 62 (51-72)    | 59 (50-80)    | 71 (58-133)   | .105‡ | 61 (52-76)    | 74 (55-162)    | .075‡ |
| Lactate<br>dehydrogenase—U/L         | (a) | 312 (204-483) | 196 (137-251) | 294 (242-384) | 499 (354-587) | .000‡ | 260 (192-379) | 544 (476-608)  | .000‡ |
|                                      | (b) | 267 (219-419) | 207 (146-240) | 246 (212-305) | 425 (275-616) | .000‡ | 242 (206-283) | 593 (425-875)  | .000‡ |
| Hydroxybutyrate<br>dehydrogenase—U/L | (a) | 253 (190-368) | 161 (118-218) | 252 (192-329) | 387 (313-478) | .000‡ | 227 (172-316) | 343 (334-526)  | .000‡ |
|                                      | (b) | 209 (147-282) | 154 (132-192) | 185 (148-220) | 435 (243-687) | .000‡ | 186 (146-230) | 474 (329-858)  | .000‡ |
| Creatine kinase—U/L                  | (a) | 61 (47-143)   | 48 (36-66)    | 65 (41-122)   | 107 (54-275)  | .007‡ | 56 (41-117)   | 116 (67-277)   | .009‡ |
|                                      | (b) | 47 (33-66)    | 47 (33-57)    | 35 (23-49)    | 55 (37-100)   | .026‡ | 42 (28-57)    | 67 (49-133)    | .003‡ |
| Creatine<br>kinase—MB—U/L            | (a) | 12 (9-19)     | 9 (7-12)      | 13 (9-21)     | 14 (10-23)    | .006‡ | 11 (8-16)     | 17 (10-24)     | .045‡ |
|                                      | (b) | 10 (7-16)     | 8 (7-10)      | 9 (7-15)      | 12 (9-22)     | .035‡ | 8 (7-13)      | 19 (11-24)     | .008‡ |
| Blood urea<br>nitrogen—mmol/L        | (a) | 5.0 (3.4-6.7) | 4.2 (3.3-5.5) | 4.5 (2.9-6.9) | 5.4 (4.0-7.7) | .158‡ | 4.4 (3.3-6.0) | 6.4 (4.3-9.1)  | .004‡ |
|                                      | (b) | 5.0 (3.9-6.7) | 4.4 (4.1-5.9) | 4.4 (3.3-5.6) | 5.8 (4.2-8.2) | .041‡ | 4.5 (3.5-5.4) | 7.5 (5.3-10.1) | .001‡ |
| Creatinine—μmol/L                    | (a) | 66 (53-84)    | 64 (52-70)    | 61 (51-92)    | 70 (58-93)    | .121‡ | 62 (52-73)    | 90 (68-101)    | .000‡ |
|                                      | (b) | 62 (53-81)    | 57 (51-69)    | 63 (53-82)    | 66 (54-86)    | .572‡ | 59 (51-74)    | 79 (63-101)    | .012‡ |
| Fasting Blood<br>Glucose—mmol/L      | (a) | 6.5 (5.7-7.6) | 5.7 (5.3-6.5) | 6.3 (5.6-6.8) | 7.5 (6.4-8.7) | .000‡ | 6.1 (5.4-7.0) | 7.4 (6.6-9.9)  | .001‡ |
|                                      | (b) | 6.1 (5.5-7.5) | 5.8 (5.4-6.1) | 5.6 (5.2-6.3) | 6.9 (6.4-9.4) | .001‡ | 5.8 (5.3-6.6) | 7.4 (6.6-10.7) | .000‡ |

Parameters tested **(a)** on admission and **(b)** after 2-4 days of hospitalization. Data are median (IQR) or n (%). P values were calculated by Kruskal-Wallis Test (‡), Mann-Whitney U test (†),  $\chi^2$  test (#), or Fisher's exact test(!), as appropriate for group comparison analyses. \*\*: P<0.01, Kruskal-Wallis Test, admission vs. 2-4 days after hospitalization.

**Table 2: Proximity Matrix of six multi-organ injury indicators by Hierarchical cluster analysis**

|                                                |                 | <b>FBG (a)</b> | <b>LDH (a)</b> | <b>Cr (a)</b> | <b>CK (a)</b> | <b>HDDH (a)</b> | <b>ALT (a)</b> |
|------------------------------------------------|-----------------|----------------|----------------|---------------|---------------|-----------------|----------------|
| <b>FBG (a)</b><br>with<br><b>Variables (a)</b> | <b>FBG (a)</b>  | 1              |                |               |               |                 |                |
|                                                | <b>LDH (a)</b>  | 0.153          | 1              |               |               |                 |                |
|                                                | <b>Cr (a)</b>   | 0.135          | 0.240          | 1             |               |                 |                |
|                                                | <b>CK (a)</b>   | 0.067          | 0.236          | 0.011         | 1             |                 |                |
|                                                | <b>HDDH (a)</b> | 0.224          | **0.734        | 0.190         | **0.488       | 1               |                |
|                                                | <b>ALT (a)</b>  | 0.074          | 0.269          | -0.075        | 0.075         | 0.211           | 1              |
|                                                |                 | <b>FBG (b)</b> | <b>LDH (b)</b> | <b>Cr (b)</b> | <b>CK (b)</b> | <b>HDDH (b)</b> | <b>ALT (b)</b> |
| <b>FBG (b)</b><br>with<br><b>Variables (b)</b> | <b>FBG (b)</b>  | 1              |                |               |               |                 |                |
|                                                | <b>LDH (b)</b>  | **0.576        | 1              |               |               |                 |                |
|                                                | <b>Cr (b)</b>   | **0.383        | 0.274          | 1             |               |                 |                |
|                                                | <b>CK (b)</b>   | 0.167          | 0.331          | 0.119         | 1             |                 |                |
|                                                | <b>HDDH (b)</b> | **0.622        | **0.883        | 0.140         | **0.388       | 1               |                |
|                                                | <b>ALT (b)</b>  | 0.075          | **0.445        | 0.264         | 0.021         | 0.252           | 1              |
|                                                |                 | <b>FBG (a)</b> | <b>LDH (b)</b> | <b>Cr (b)</b> | <b>CK (b)</b> | <b>HDDH (b)</b> | <b>ALT (b)</b> |
| <b>FBG (a)</b><br>with<br><b>Variables (b)</b> | <b>FBG (a)</b>  | 1              |                |               |               |                 |                |
|                                                | <b>LDH (b)</b>  | **0.433        | 1              |               |               |                 |                |
|                                                | <b>Cr (b)</b>   | **0.498        | 0.265          | 1             |               |                 |                |
|                                                | <b>CK (b)</b>   | 0.025          | *0.328         | 0.113         | 1             |                 |                |
|                                                | <b>HDDH (b)</b> | **0.428        | **0.881        | 0.128         | **0.385       | 1               |                |
|                                                | <b>ALT (b)</b>  | 0.099          | **0.441        | 0.258         | 0.017         | 0.246           | 1              |

1 Parameters tested (a) on admission and (b) after 2-4 days of hospitalization. \*\* p<0.01; \*

2 P<0.05. Hierarchical cluster analysis, Pearson correlation test (2-tailed).

3

## 1 **Figure legend**

### 2 **Figure 1. Profile of ACE2 multi-organ expression and corresponding multi-organ injury.**

3 (A) Immunohistochemically pattern of ACE2 (SARS-CoV-2 receptor) protein  
4 expression in different organs. (1-2) Lung: high expression of ACE2 was found in (1)  
5 bronchiolar epithelial cells and (2) alveolar epithelial cells. (3-5) Pancreas: serial  
6 sections including (3) Hematoxylin-Eosin (HE) stain showing the exocrine tissue of  
7 pancreas around and a pancreatic islet in the middle, (4) negative immunostaining  
8 control showing no non-specific staining, (5) expression of ACE2 in pancreas as  
9 assessed by immunohistochemistry showing endocrine tissue is strongly positive  
10 compared with exocrine tissue. (6) Heart: ACE2 was present in the myocytes,  
11 myocardium, border zone, endothelium of small-to-large arteries as well as  
12 sporadically within the smooth muscle of these vessels. (7) Kidney: ACE2 was very  
13 weakly present in glomerular visceral and parietal epithelium, but strongly present in  
14 the brush border and cytoplasm of proximal tubular cells, and in the cytoplasm of  
15 distal tubules and collecting ducts. (8) Liver: hepatocytes and other cells including the  
16 endothelium of sinusoids were negative.

17 (B) Kaplan–Meier survival curves for in-hospital death rate of patients with  
18 COVID-19 subgroup by indicators of multi-organ injury including: FBG  $\geq 7.0$ mmol/L  
19 for the pancreatic islet; LDH  $\geq 250$  IU/L for the heart; Cr  $\geq 97$   $\mu$ mol/L for the kidney  
20 and ALT  $\geq 40$  IU/L for the liver. log-rank test.

21 (C) At the time of (a) admission and (b) after 2-4 days of hospitalization, levels of FBG, LDH,  
22 Cr and ALT among *Critical*, *Severe* and *Moderate* patients with COVID-19 (mean  $\pm$  s.e.m.,  
23 *Moderate*, n=23; *Severe*, n= 20; and *Critical*, n=26).

24 (D-G) Longitudinal observation during admission and subsequent treatment, levels of (D)  
25 FBG, (E) LDH, (F) Cr, and (G) ALT in five survived *Critical* patients (S1-S5) (Left) and  
26 in five deceased *Critical* patients (D1-D5) (Right).

1 **Figure 2. Effects of indicators of multi-organ injury on the risk of poor outcomes and**  
2 **in-hospital death in patients with COVID-19.**

3 (A) Univariable Logistic regression indicated odds ratios (OR) for effects of indicators of  
4 multi-organ injury on poor outcomes.

5 (B) Multivariable Logistic regression indicated OR for effects of independent indicators of  
6 multi-organ injury on poor outcomes.

7 (C) Univariable Cox regression indicated effects of indicators of multi-organ injury on  
8 predicting in-hospital death.

9 (D) Multivariable Cox regression indicated effects of independent indicators of multi-organ  
10 injury on predicting in-hospital death.

11 (E) Hierarchical cluster analysis of six indicators indicated these indicators were  
12 interdependent to each other.

A

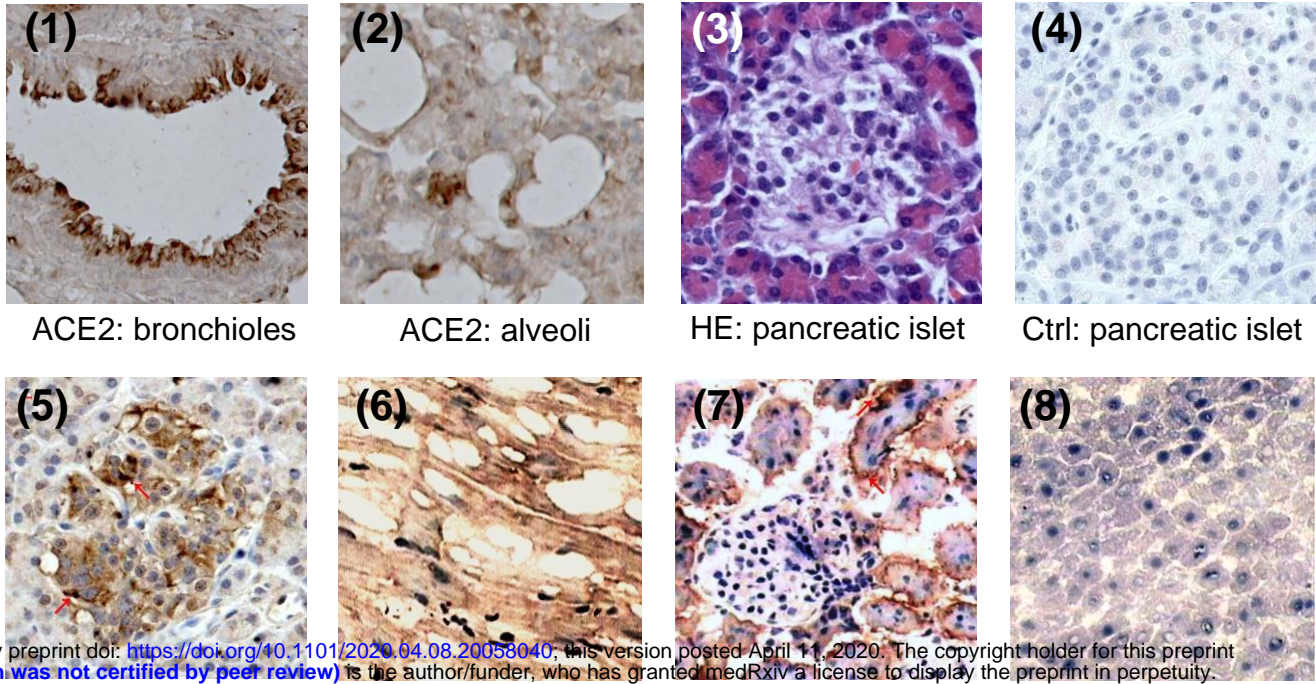

ACE2: bronchioles

ACE2: alveoli

HE: pancreatic islet

Ctrl: pancreatic islet

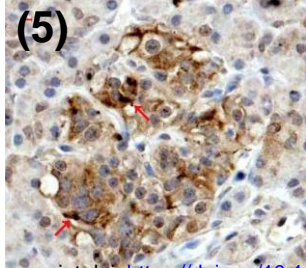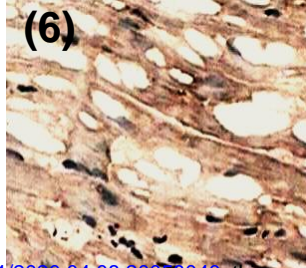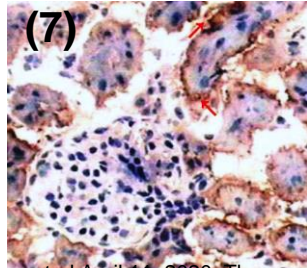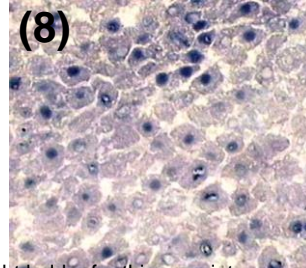

medRxiv preprint doi: <https://doi.org/10.1101/2020.04.08.20058040>; this version posted April 11, 2020. The copyright holder for this preprint (which was not certified by peer review) is the author/funder, who has granted medRxiv a license to display the preprint in perpetuity. It is made available under a [CC-BY-NC-ND 4.0 International license](https://creativecommons.org/licenses/by-nc-nd/4.0/).

B

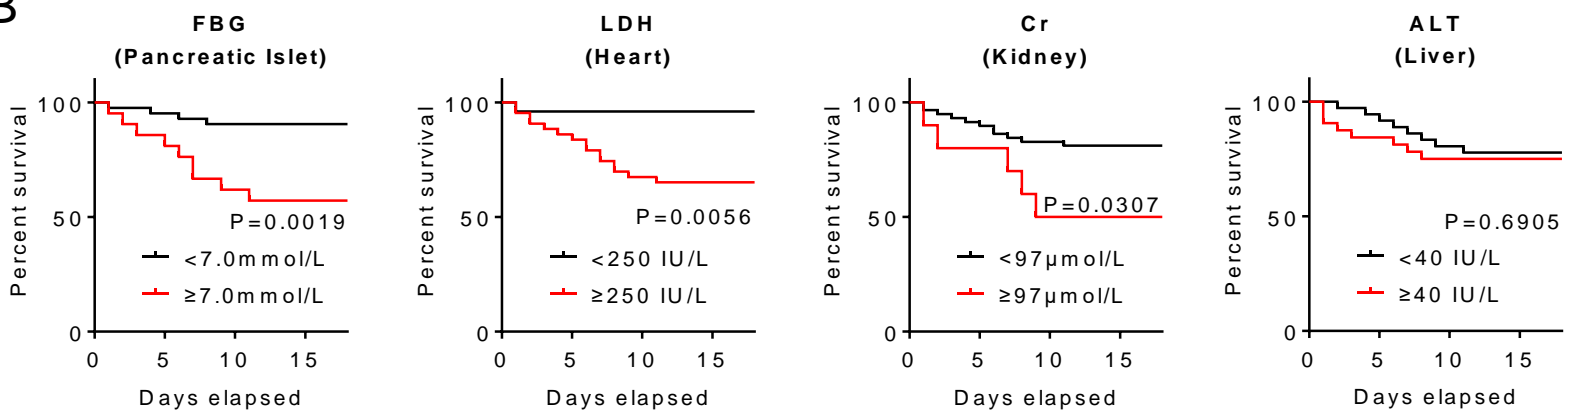

C

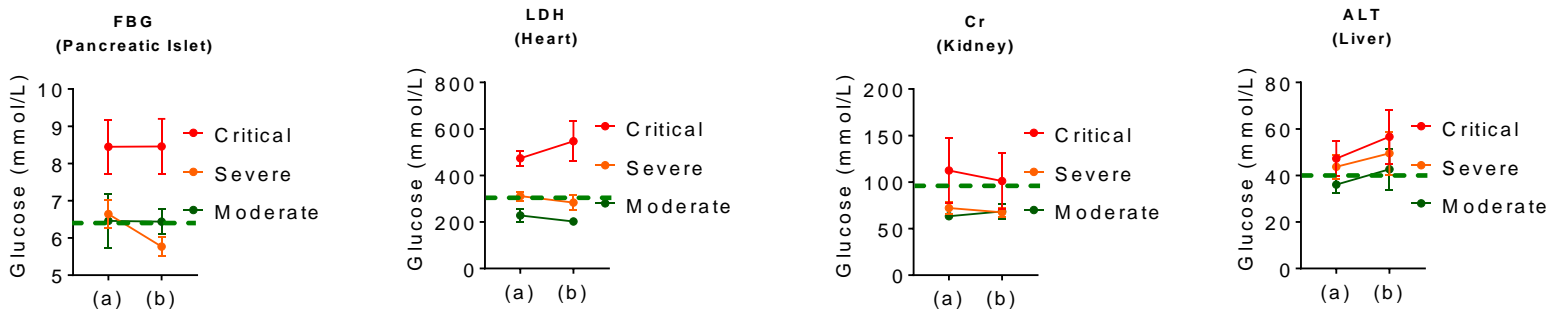

D

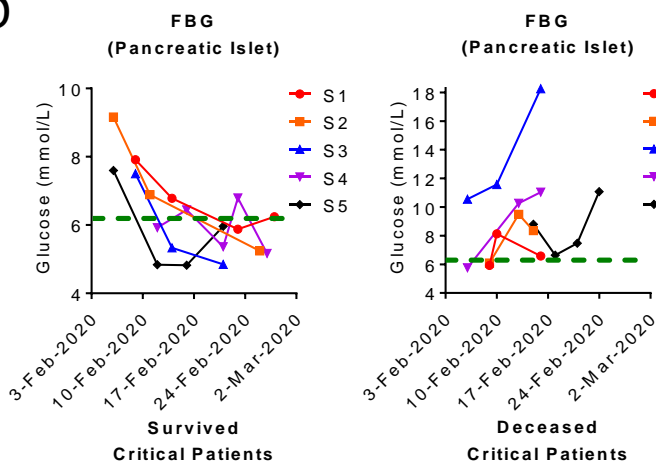

E

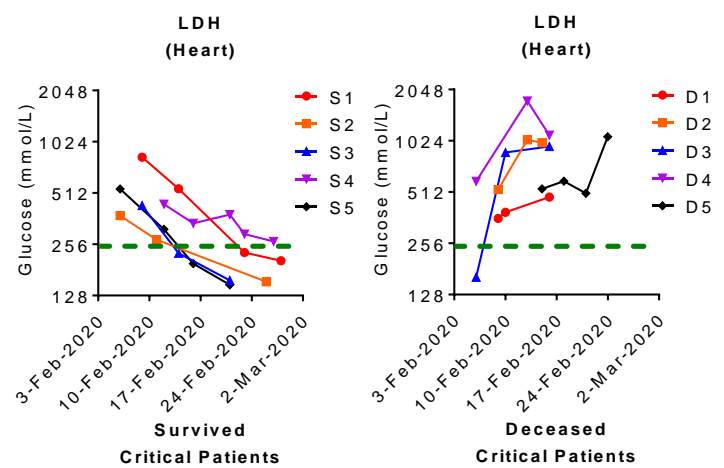

F

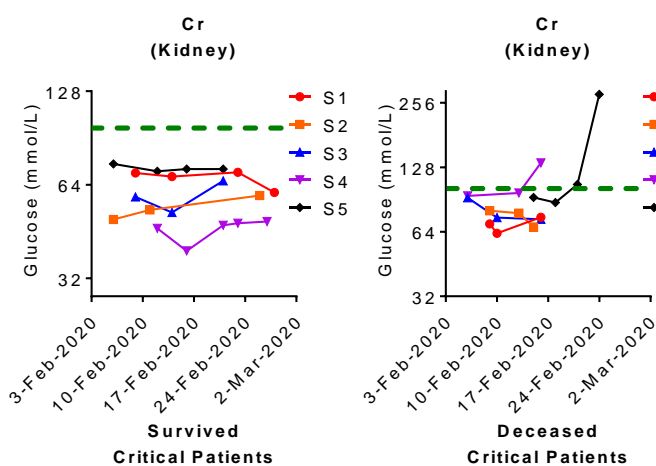

G

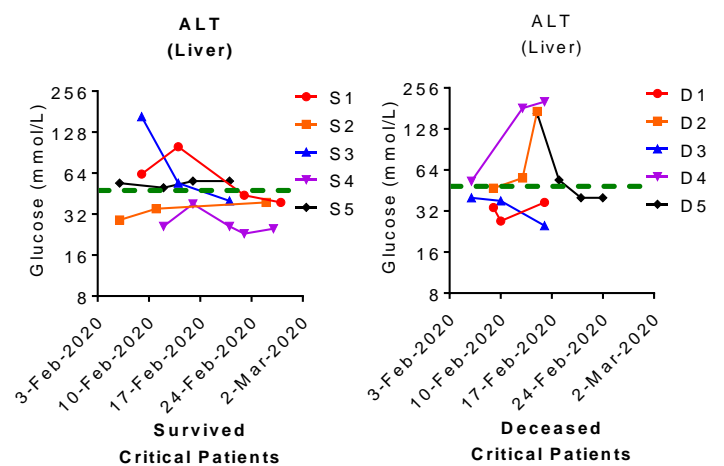



A

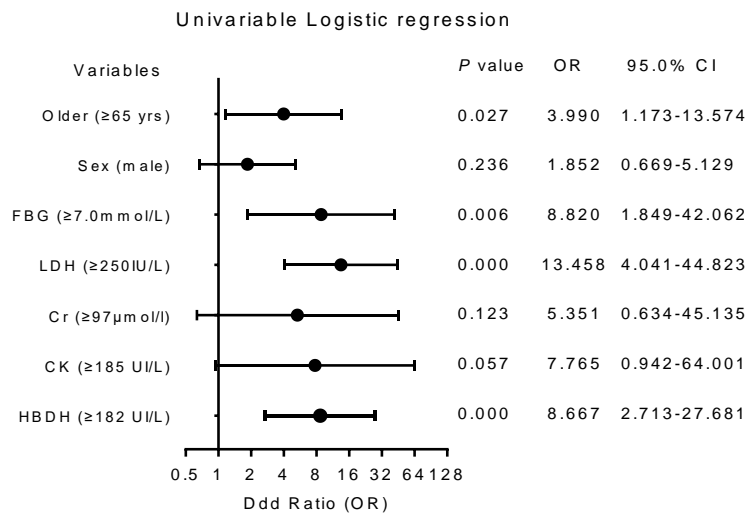

B

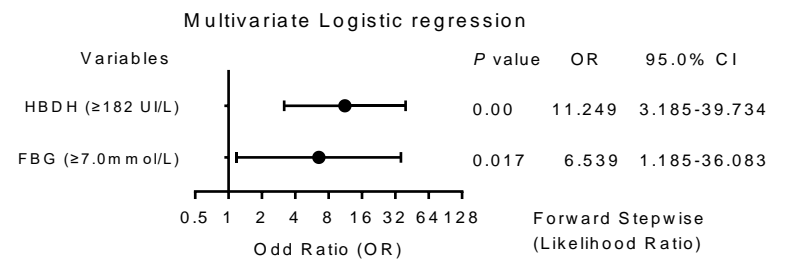

D

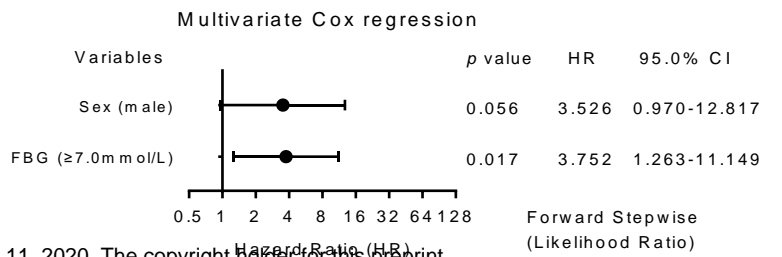

medRxiv preprint doi: <https://doi.org/10.1101/2020.04.08.20058040>; this version posted April 11, 2020. The copyright holder for this preprint (which was not certified by peer review) is the author/funder, who has granted medRxiv a license to display the preprint in perpetuity. It is made available under a [CC-BY-NC-ND 4.0 International license](https://creativecommons.org/licenses/by-nc-nd/4.0/).

C

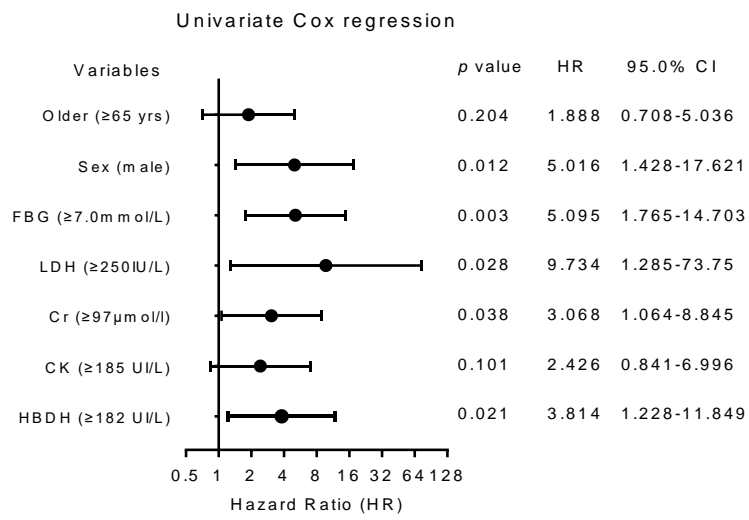

E

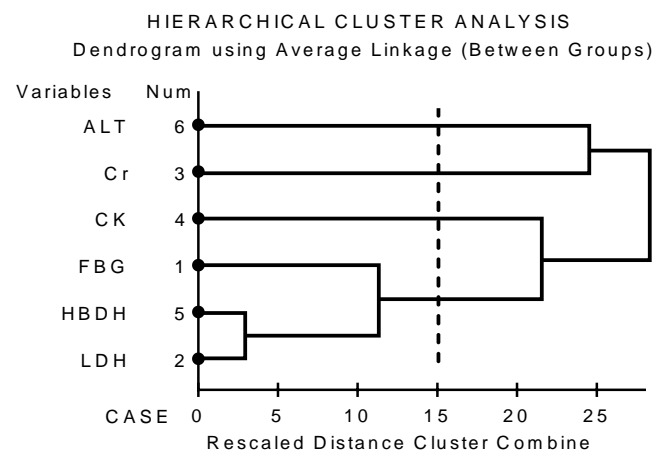

Source: https://www.medrxiv.org/content/medrxiv/early/2020/04/11/2020.04.08.20058040.full.pdf
